# Supplementary material
Source: PubMed Central journal article supplement (PMC11075462)
Supplement: iai.00080-24-s0001.pdf [file iai.00080-24-s0001.pdf]

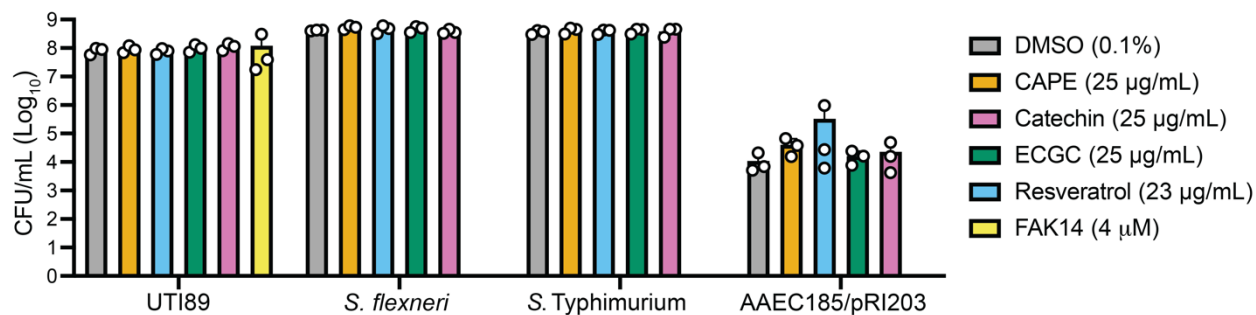

**Fig S1. Impact of the phenolic compounds and FAK14 on bacterial viability.**

Bacteria were inoculated into 24-well plates containing complete RPMI medium  $\pm$  the indicated drugs or DMSO (carrier alone), as described for the cell association and invasion assays but without host cells present. After 2-h incubations in a humidified CO<sub>2</sub> incubator at 37°C, bacterial titers were enumerated by plating serial dilutions. Bars indicate mean values from 3 independent assays (with SD).
